# Supplementary material
Source: PubMed Central journal article supplement (PMC3607000)
Supplement: 1220162110_pnas.201220162SI.pdf [file 1220162110_pnas.201220162SI.pdf]

# Supporting Information

Sun et al. 10.1073/pnas.1220162110

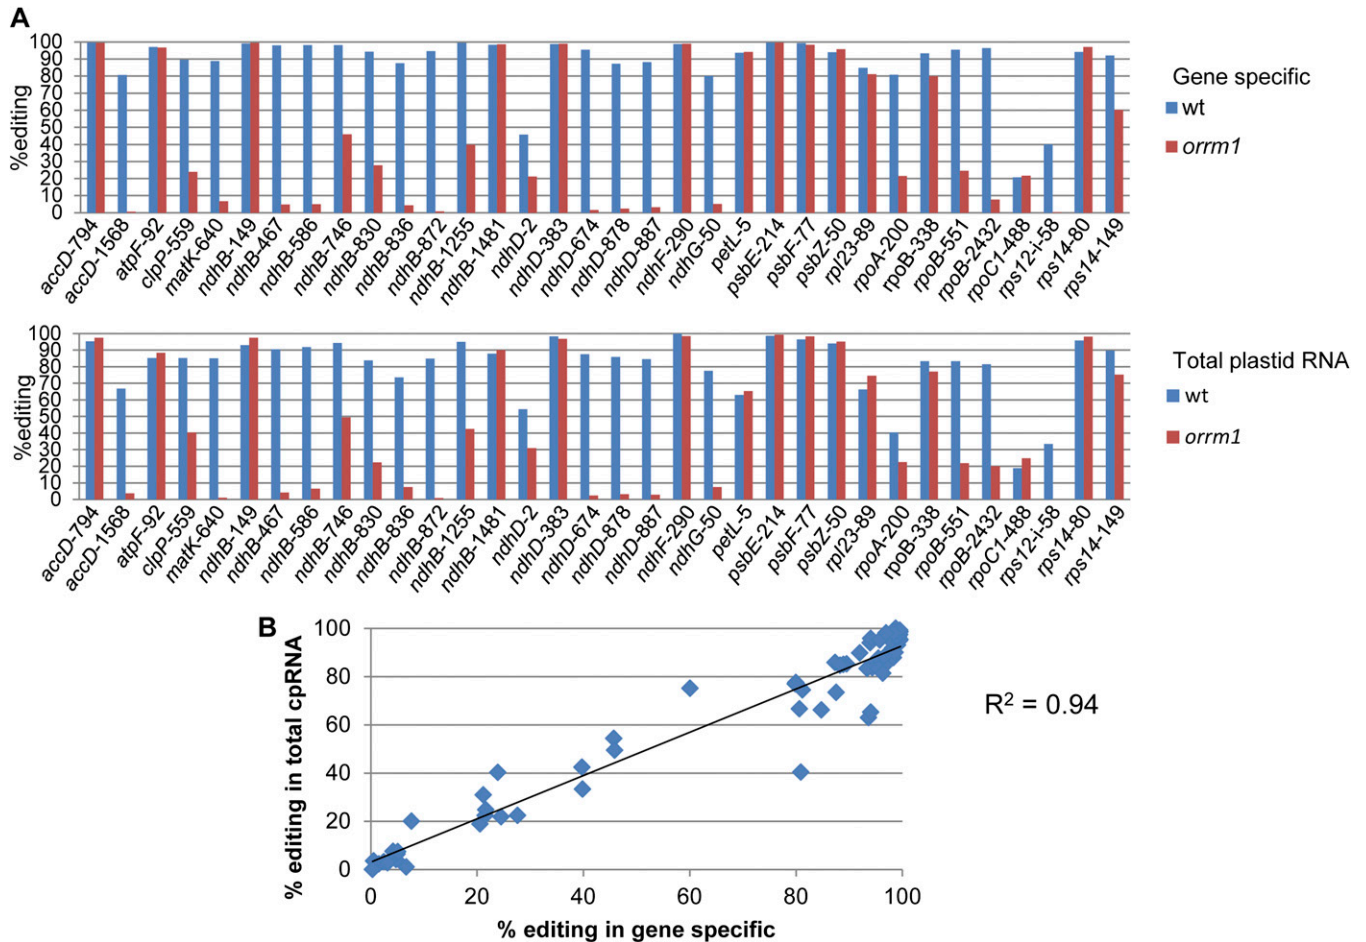

**Fig. S1.** The reduction of plastid editing extent in the At3g20930 T-DNA insertional mutant is consistently detected in different RNA-seq experiments. (A) Comparison of the editing extent of the 34 plastid sites in a wild-type (wt) and *orm1* mutant plants. The values of editing extent were obtained from gene-specific (Upper) or total plastid RNA (Lower). (B) A correlation  $>0.9$  exists between level of editing extent evaluated on cDNAs corresponding to gene transcripts (gene-specific) and cDNAs corresponding to the whole plastid transcriptome (total plastid RNA).

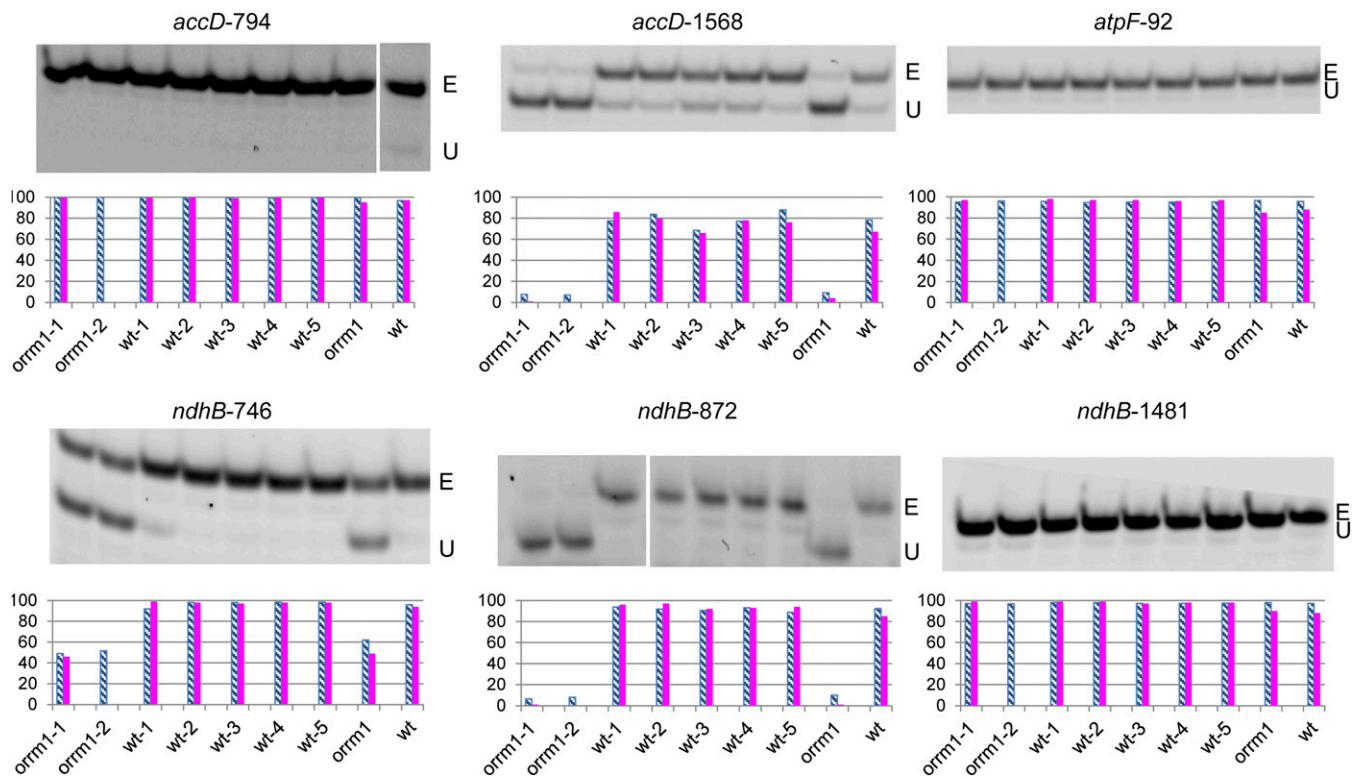

**Fig. S2.** The poisoned primer extension (PPE) assay confirms the plastid editing defects detected in the *orr1* mutant by RNA-seq. Acrylamide gels separate the PPE products obtained from samples used in this study. E, edited; U, unedited. The name of the site assayed is given above each gel. The quantification of editing extent derived from the measure of the band's intensity is represented by a bar below each lane of the acrylamide gels (blue diagonal background). As a way of comparison, the editing extent derived from RNA-seq is represented by a magenta bar. RNA-seq was performed on gene specific cDNAs for *orr1-1*, *wt-1*, *wt-2*, *wt-3*, *wt-4*, and *wt-5*, and on total plastid RNA for *orr1* and *wt*. *orr1-1* and *orr1-2* are two homozygous mutant plants.

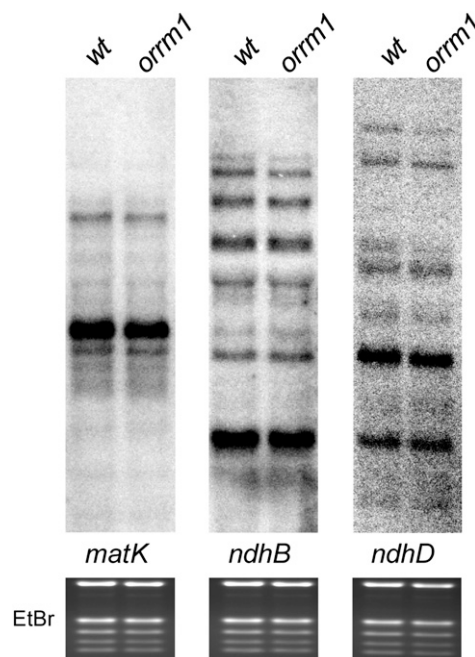

**Fig. S3.** RNA blots demonstrate the absence of change of transcript abundance in the *orr1* mutant. Below each blot is given the name of the transcript corresponding to the probe used. Below each blot is shown the EtBr gel as a control for equal loading of the wild-type and *orr1* RNAs.

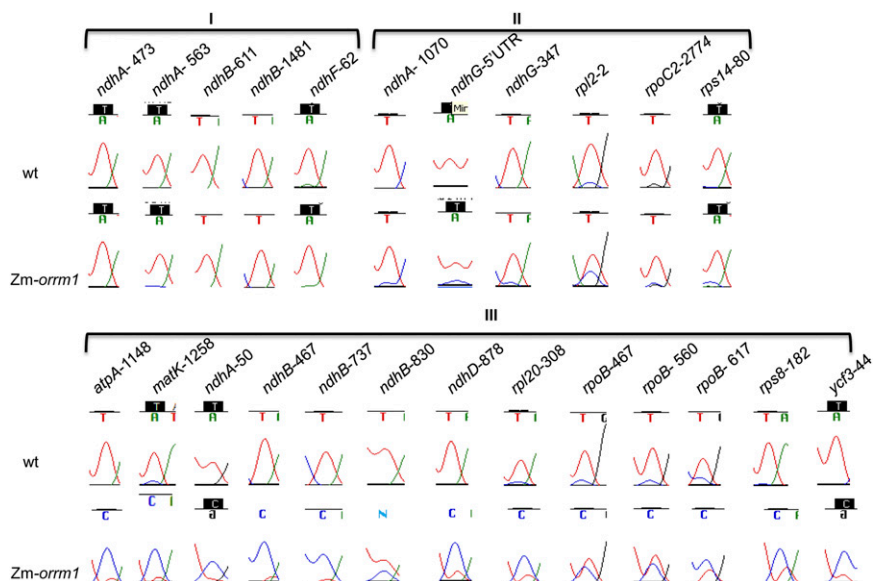

**Fig. 54.** Plastid editing sites in the *Zm-orm1* mutant either do not show a reduction of editing extent (I), or show a slight (II), or pronounced (III) reduction of editing extent compared with the wild-type plant. Bulk-sequencing electrophoretograms of RT-PCR products obtained from wild-type (Upper), and *Zm-orm1* (Lower) plants. Above each electrophoretogram is given the editing site. Notice the difference in the height of the T (edited, red) and C (unedited, blue) peaks between wild-type plant and the *Zm-orm1* mutant particularly for editing sites belonging to the III category.

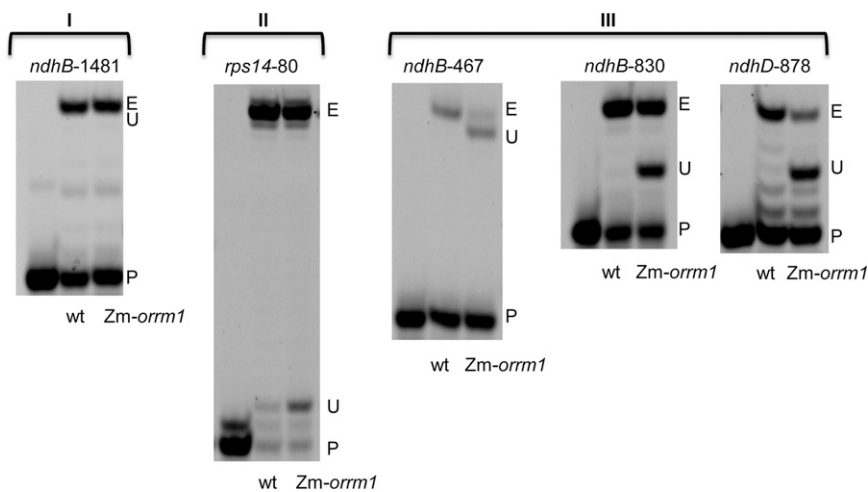

**Fig. 55.** PPE assay confirms the plastid editing sites in the *Zm-orm1* mutant to either show an absence of reduction of editing extent (I), or to show a slight (II) or pronounced (III) reduction of editing extent compared with the wild-type plant. Acrylamide gels separate the PPE products obtained from the wild-type (wt) and the *Zm-orm1* mutant plant. E, edited; U, unedited; P, primer. The name of the site assayed is given above each gel.



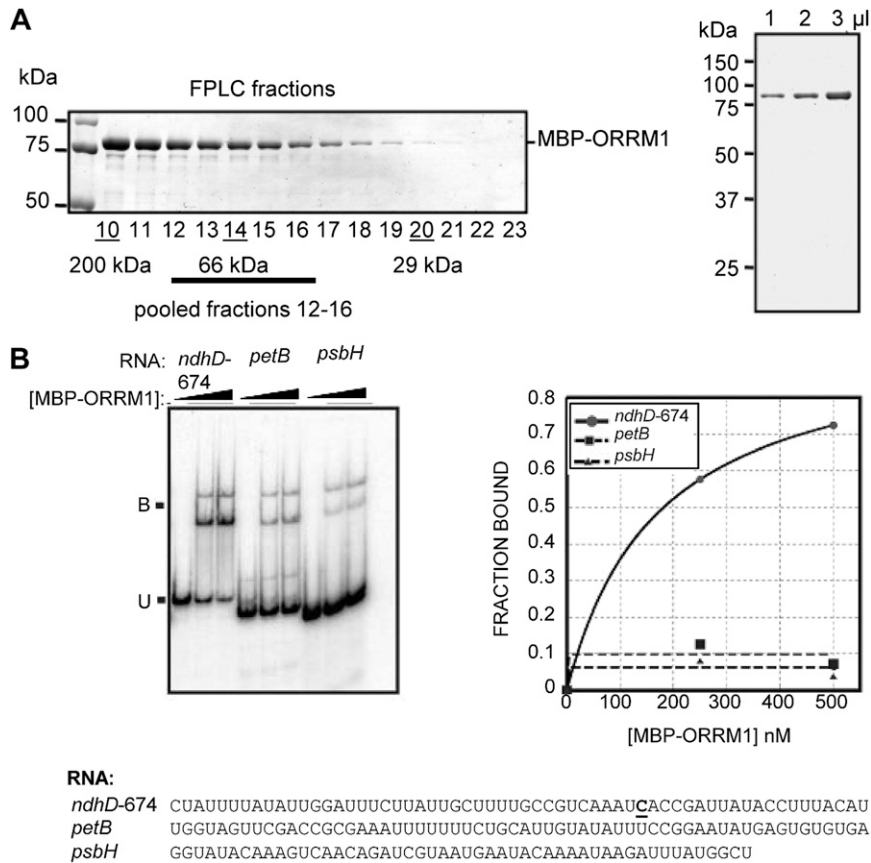

**Fig. S7.** Additional evidence for binding of ORRM1 to specific RNA substrates. (A) Purification of recombinant MBP-ORRM1. MBP-ORRM1 was purified by amylose affinity chromatography followed by size fractionation in a Superdex 200 gel-filtration column. Superdex 200 column fractions were analyzed by SDS/PAGE and staining with Coomassie blue (Left). Fractions 12–16 were pooled and dialyzed against storage buffer. The purity of the final preparation is shown in the gel to the right, which was also stained with Coomassie blue. (B) Additional gel mobility-shift assays with MBP-ORRM1. Assays were performed as in Fig. 8, except that NaCl was present at 200 mM.

| Sequence                        | Species                        | E-value | Domain Structure       |
|---------------------------------|--------------------------------|---------|------------------------|
| gij18402803 ref 1 -ORRM1        | <i>Arabidopsis thaliana</i>    | 1.3e-33 | RIP domain, RRM domain |
| gij255568010 ref XP_002524982.1 | <i>Ricinus communis</i>        | 1.2e-29 | RIP domain, RRM domain |
| gij297830792 ref XP_002883278.1 | <i>Arabidopsis lyrata</i>      | 8.7e-29 | RIP domain, RRM domain |
| gij224110196 ref XP_002315444.1 | <i>Populus trichocarpa</i>     | 7.2e-26 | RIP domain, RRM domain |
| gij356576299 ref XP_003556270.1 | <i>Glycine max</i>             | 8.6e-26 | RIP domain, RRM domain |
| gij224097630 ref XP_002311019.1 | <i>Populus trichocarpa</i>     | 1.8e-25 | RIP domain, RRM domain |
| gij357143694 ref XP_003573016.1 | <i>Brachypodium distachyon</i> | 3.4e-19 | RIP domain, RRM domain |
| gij225464121 ref XP_002264164.1 | <i>Vitis vinifera</i>          | 6.6e-19 | RIP domain, RRM domain |
| gij259490527 ref NP_001159310.1 | <i>Zea mays</i>                | 6.6e-19 | RIP domain, RRM domain |
| gij115448473 ref NP_001048016.1 | <i>Oryza sativa</i>            | 9.7e-18 | RIP domain, RRM domain |

**Fig. S8.** Known proteins that contain a twin truncated RNA-editing factor interacting protein (RIP)-RIP always carry a RRM domain. The RIP domain defined by MEME was used to interrogate a nonredundant protein database with the MAST search program. All of the significant hits carrying a set of truncated RIP-RIP, like ORRM1, also contain a downstream RRM domain.



**Table S1. Effect of the T-DNA insertional mutation in ORRM1 on the editing extent of plastid sites**

| Gene         | Position | Gene specific  |              |                |                  |        |              |        |                | Total plastid RNA |                |                 |       |              |       |  |  |
|--------------|----------|----------------|--------------|----------------|------------------|--------|--------------|--------|----------------|-------------------|----------------|-----------------|-------|--------------|-------|--|--|
|              |          | Editing extent |              |                | Number of reads* |        |              |        | Editing extent |                   |                | Number of reads |       |              |       |  |  |
|              |          | WT             | <i>orrm1</i> | $\Delta orrm1$ | WT               |        | <i>orrm1</i> |        | WT             | <i>orrm1</i>      | $\Delta orrm1$ | WT              |       | <i>orrm1</i> |       |  |  |
|              |          |                |              |                | C                | T      | C            | T      |                |                   |                | C               | T     | C            | T     |  |  |
| <i>accD</i>  | 794      | 1.00           | 1.00         | 0.00           | 70               | 17,812 | 24           | 5,148  | 0.95           | 0.97              | -0.02          | 5               | 102   | 3            | 113   |  |  |
| <i>accD</i>  | 1,568    | 0.81           | 0.01         | 0.99           | 2,937            | 12,252 | 20,671       | 117    | 0.67           | 0.04              | 0.95           | 19              | 38    | 54           | 2     |  |  |
| <i>atpF</i>  | 92       | 0.97           | 0.97         | 0.00           | 1,920            | 62,144 | 1,825        | 54,857 | 0.85           | 0.88              | -0.04          | 182             | 1,057 | 156          | 1,194 |  |  |
| <i>clpP</i>  | 559      | 0.90           | 0.24         | 0.73           | 1,144            | 9,814  | 19,229       | 6,043  | 0.85           | 0.40              | 0.53           | 21              | 121   | 98           | 66    |  |  |
| <i>matK</i>  | 640      | 0.89           | 0.07         | 0.92           | 2,633            | 21,095 | 573          | 41     | 0.85           | 0.01              | 0.99           | 18              | 102   | 93           | 1     |  |  |
| <i>ndhB</i>  | 149      | 0.99           | 0.99         | 0.00           | 315              | 36,606 | 107          | 17,738 | 0.93           | 0.97              | -0.05          | 32              | 429   | 24           | 908   |  |  |
| <i>ndhB</i>  | 467      | 0.98           | 0.05         | 0.95           | 625              | 31,831 | 29,209       | 1,473  | 0.91           | 0.04              | 0.95           | 54              | 515   | 835          | 36    |  |  |
| <i>ndhB</i>  | 586      | 0.98           | 0.05         | 0.95           | 612              | 33,777 | 27,689       | 1,460  | 0.92           | 0.06              | 0.93           | 40              | 447   | 583          | 40    |  |  |
| <i>ndhB</i>  | 746      | 0.98           | 0.46         | 0.53           | 375              | 20,070 | 13,551       | 11,499 | 0.94           | 0.49              | 0.48           | 26              | 436   | 336          | 329   |  |  |
| <i>ndhB</i>  | 830      | 0.94           | 0.28         | 0.71           | 461              | 7,731  | 19,234       | 7,351  | 0.84           | 0.22              | 0.73           | 31              | 159   | 371          | 107   |  |  |
| <i>ndhB</i>  | 836      | 0.88           | 0.04         | 0.95           | 965              | 6,806  | 25,408       | 1,122  | 0.73           | 0.08              | 0.90           | 30              | 83    | 407          | 33    |  |  |
| <i>ndhB</i>  | 872      | 0.95           | 0.01         | 0.99           | 685              | 11,974 | 27,525       | 191    | 0.85           | 0.01              | 0.99           | 23              | 129   | 360          | 3     |  |  |
| <i>ndhB</i>  | 1,255    | 1.00           | 0.40         | 0.60           | 204              | 40,709 | 12,844       | 8,474  | 0.95           | 0.42              | 0.55           | 20              | 376   | 233          | 172   |  |  |
| <i>ndhB</i>  | 1,481    | 0.98           | 0.99         | 0.00           | 268              | 15,846 | 320          | 23,271 | 0.88           | 0.90              | -0.03          | 43              | 310   | 53           | 478   |  |  |
| <i>ndhD</i>  | 2        | 0.46           | 0.21         | 0.54           | 71,538           | 60,341 | 11,478       | 3,086  | 0.54           | 0.31              | 0.43           | 99              | 118   | 230          | 103   |  |  |
| <i>ndhD</i>  | 383      | 0.99           | 0.99         | 0.00           | 392              | 35,163 | 124          | 11,839 | 0.98           | 0.97              | 0.01           | 12              | 674   | 21           | 640   |  |  |
| <i>ndhD</i>  | 674      | 0.96           | 0.02         | 0.98           | 1,346            | 28,753 | 12,917       | 199    | 0.88           | 0.02              | 0.97           | 63              | 446   | 721          | 17    |  |  |
| <i>ndhD</i>  | 878      | 0.87           | 0.02         | 0.97           | 6,529            | 45,066 | 15,494       | 388    | 0.86           | 0.03              | 0.96           | 112             | 679   | 968          | 32    |  |  |
| <i>ndhD</i>  | 887      | 0.88           | 0.03         | 0.96           | 6,077            | 45,838 | 15,359       | 504    | 0.85           | 0.03              | 0.97           | 104             | 573   | 723          | 21    |  |  |
| <i>ndhF</i>  | 290      | 0.99           | 0.99         | 0.00           | 844              | 66,974 | 204          | 20,210 | 1.00           | 0.99              | 0.01           | 0               | 55    | 1            | 67    |  |  |
| <i>ndhG</i>  | 50       | 0.80           | 0.05         | 0.94           | 5,111            | 20,447 | 10,297       | 553    | 0.77           | 0.07              | 0.90           | 41              | 141   | 248          | 20    |  |  |
| <i>petL</i>  | 5        | 0.94           | 0.94         | 0.00           | 296              | 4,371  | 480          | 7,642  | 0.63           | 0.65              | -0.04          | 10              | 17    | 8            | 15    |  |  |
| <i>psbE</i>  | 214      | 1.00           | 1.00         | 0.00           | 112              | 28,930 | 382          | 87,546 | 0.99           | 0.99              | -0.01          | 33              | 2,232 | 26           | 3,253 |  |  |
| <i>psbF</i>  | 77       | 0.99           | 0.98         | 0.01           | 12               | 1,764  | 213          | 12,773 | 0.96           | 0.98              | -0.02          | 73              | 1,957 | 54           | 3,026 |  |  |
| <i>psbZ</i>  | 50       | 0.94           | 0.96         | -0.02          | 5,129            | 79,997 | 2,383        | 53,887 | 0.94           | 0.95              | -0.01          | 121             | 1,906 | 76           | 1,479 |  |  |
| <i>rpl23</i> | 89       | 0.85           | 0.81         | 0.04           | 1,010            | 5,632  | 1,746        | 7,562  | 0.66           | 0.75              | -0.13          | 25              | 49    | 26           | 76    |  |  |
| <i>rpoA</i>  | 200      | 0.81           | 0.22         | 0.73           | 10,415           | 44,159 | 7,017        | 1,927  | 0.40           | 0.22              | 0.44           | 111             | 75    | 107          | 31    |  |  |
| <i>rpoB</i>  | 338      | 0.93           | 0.80         | 0.14           | 1,141            | 16,137 | 2,668        | 10,601 | 0.83           | 0.77              | 0.08           | 5               | 25    | 6            | 20    |  |  |
| <i>rpoB</i>  | 551      | 0.96           | 0.25         | 0.74           | 1,086            | 23,061 | 6,419        | 2,086  | 0.83           | 0.22              | 0.74           | 4               | 20    | 25           | 7     |  |  |
| <i>rpoB</i>  | 2,432    | 0.96           | 0.08         | 0.92           | 2,608            | 68,572 | 4,126        | 343    | 0.81           | 0.20              | 0.75           | 8               | 35    | 24           | 6     |  |  |
| <i>rpoC1</i> | 488      | 0.21           | 0.22         | -0.05          | 36,084           | 9,359  | 71,377       | 19,698 | 0.19           | 0.25              | -0.32          | 198             | 46    | 133          | 44    |  |  |
| <i>rps12</i> | i-58     | 0.40           | 0.00         | 0.99           | 17,174           | 11,391 | 5,454        | 18     | 0.33           | 0.00              | 1.00           | 14              | 7     | 25           | 0     |  |  |
| <i>rps14</i> | 80       | 0.94           | 0.97         | -0.03          | 1662             | 26,479 | 105          | 3,384  | 0.96           | 0.98              | -0.02          | 75              | 1,702 | 99           | 5,057 |  |  |
| <i>rps14</i> | 149      | 0.92           | 0.60         | 0.35           | 1645             | 18,939 | 992          | 1,494  | 0.90           | 0.75              | 0.16           | 200             | 1,757 | 1,081        | 3,264 |  |  |

Editing extent:  $EE = T/(C + T)$ .  $\Delta orrm1$ : variation of editing extent in *orrm1* mutant =  $[EE(wt) - EE(orrm1)]/EE(wt)$ . *orrm1* was sequenced twice, the number of reads are the sums of the two sequencing experiments

\*C(WT) = C (wt-1) + C (wt-2) + C (wt-3) + C (wt-4) + C (wt-5); T (WT) = T (wt-1) + T (wt-2) + T (wt-3) + T (wt-4) + T (wt-5).

**Table S2. Editing extent of the plastid sites in the maize *Zm-orm1* mutant**

| Gene              | Position in maize cds | Position in <i>Arabidopsis</i> cds | Editing extent |     |                  |                |      |                  |                      |      |                  |  |  |  |
|-------------------|-----------------------|------------------------------------|----------------|-----|------------------|----------------|------|------------------|----------------------|------|------------------|--|--|--|
|                   |                       |                                    | Bulk           |     |                  | PPE            |      |                  | <i>Arabidopsis</i> * |      |                  |  |  |  |
|                   |                       |                                    | <i>Zm-orm1</i> | WT  | $\Delta Zm-orm1$ | <i>Zm-orm1</i> | WT   | $\Delta Zm-orm1$ | <i>At-orm1</i>       | Col  | $\Delta At-orm1$ |  |  |  |
| <i>atpA</i>       | 1,148                 | T in <i>Arabidopsis</i>            | 0.1            | 1   | 0.90             |                |      |                  |                      |      |                  |  |  |  |
| <i>matk</i>       | 1,258                 | T in <i>Arabidopsis</i>            | 0.1            | 0.9 | 0.89             |                |      |                  |                      |      |                  |  |  |  |
| <i>ndhA</i>       | 50                    | T in <i>Arabidopsis</i>            | 0.1            | 1   | 0.90             |                |      |                  |                      |      |                  |  |  |  |
| <i>ndhA</i>       | 473                   | T in <i>Arabidopsis</i>            | 1              | 1   | 0.00             |                |      |                  |                      |      |                  |  |  |  |
| <i>ndhA</i>       | 563                   | T in <i>Arabidopsis</i>            | 1              | 1   | 0.00             |                |      |                  |                      |      |                  |  |  |  |
| <i>ndhA</i>       | 1,070                 | T in <i>Arabidopsis</i>            | 0.9            | 1   | 0.10             |                |      |                  |                      |      |                  |  |  |  |
| <i>ndhB</i>       | 467                   | 467                                | 0.1            | 1   | 0.90             | 0.31           | 0.97 | 0.68             | 0.05                 | 0.98 | 0.95             |  |  |  |
| <i>ndhB</i>       | 586                   | 586                                | 0              | 1   | 1.00             | 0.07           | 0.98 | 0.93             | 0.05                 | 0.98 | 0.95             |  |  |  |
| <i>ndhB</i>       | 611                   | no editing in <i>Arabidopsis</i>   | 1              | 1   | 0.00             |                |      |                  |                      |      |                  |  |  |  |
| <i>ndhB</i>       | 737                   | T in <i>Arabidopsis</i>            | 0.1            | 1   | 0.90             |                |      |                  |                      |      |                  |  |  |  |
| <i>ndhB</i>       | 830                   | 830                                | 0.6            | 1   | 0.40             | 0.65           | 0.99 | 0.34             | 0.28                 | 0.94 | 0.71             |  |  |  |
| <i>ndhB</i>       | 1,481                 | 1481                               | 1              | 1   | 0.00             | 0.99           | 0.99 | 0.00             | 0.99                 | 0.98 | 0                |  |  |  |
| <i>ndhD</i>       | 878                   | 878                                | 0.2            | 1   | 0.80             | 0.29           | 0.96 | 0.70             | 0.02                 | 0.87 | 0.97             |  |  |  |
| <i>ndhF</i>       | 62                    | T in <i>Arabidopsis</i>            | 1              | 1   | 0.00             |                |      |                  |                      |      |                  |  |  |  |
| <i>ndhG</i>       | 347                   | T in <i>Arabidopsis</i>            | 0.9            | 1   | 0.10             |                |      |                  |                      |      |                  |  |  |  |
| <i>ndhG</i> 5'UTR |                       |                                    | 0.9            | 1   | 0.10             |                |      |                  |                      |      |                  |  |  |  |
| <i>petB</i>       | 668                   | T in <i>Arabidopsis</i>            | 0              | 1   | 1.00             |                |      |                  |                      |      |                  |  |  |  |
| <i>rpl2</i>       | 2                     | T in <i>Arabidopsis</i>            | 0.7            | 0.9 | 0.22             |                |      |                  |                      |      |                  |  |  |  |
| <i>rpl20</i>      | 308                   | T in <i>Arabidopsis</i>            | 0.2            | 0.9 | 0.78             |                |      |                  |                      |      |                  |  |  |  |
| <i>rpoB</i>       | 467                   | T in <i>Arabidopsis</i>            | 0.6            | 0.9 | 0.33             |                |      |                  |                      |      |                  |  |  |  |
| <i>rpoB</i>       | 545                   | 551                                | 0              | 0.9 | 1.00             | 0.14           | 0.89 | 0.84             | 0.25                 | 0.96 | 0.74             |  |  |  |
| <i>rpoB</i>       | 560                   | T in <i>Arabidopsis</i>            | 0.6            | 0.9 | 0.33             |                |      |                  |                      |      |                  |  |  |  |
| <i>rpoB</i>       | 617                   | T in <i>Arabidopsis</i>            | 0.4            | 0.8 | 0.50             |                |      |                  |                      |      |                  |  |  |  |
| <i>rpoC2</i>      | 2,774                 | T in <i>Arabidopsis</i>            | 0.9            | 1   | 0.10             |                |      |                  |                      |      |                  |  |  |  |
| <i>rps14</i>      | 80                    | 80                                 | 0.9            | 1   | 0.10             | 0.9            | 0.97 | 0.07             | 0.97                 | 0.94 | -0.03            |  |  |  |
| <i>rps8</i>       | 182                   | T in <i>Arabidopsis</i>            | 0.3            | 1   | 0.70             |                |      |                  |                      |      |                  |  |  |  |
| <i>ycf3</i>       | 44                    | T in <i>Arabidopsis</i>            | 0.2            | 1   | 0.80             |                |      |                  |                      |      |                  |  |  |  |
| <i>ycf3</i>       | 185                   | T in <i>Arabidopsis</i>            | 0              | 1   | 1.00             |                |      |                  |                      |      |                  |  |  |  |

The editing extent values in bulk sequencing are approximate measurements based on the surface of the peaks of unedited (C peak) and unedited. (T peak), editing extent:  $EE = T/(C + T)$ . Editing extent measurements by PPE come from the measure of the intensity of the extension products bands.  $\Delta orrm1$ : variation of editing extent in *orm1* mutant =  $[EE(wt) - EE(orm1)]/EE(wt)$ .

\*Editing extent in *Arabidopsis* corresponds to the gene-specific RNA library.

**Table S3. Annotation and subcellular localization of the RRM-containing proteins related to ORRM1**

| Gene          | Protein annotation*            | E-value <sup>†</sup> | Location <sup>‡</sup> |                |          |         |
|---------------|--------------------------------|----------------------|-----------------------|----------------|----------|---------|
|               |                                |                      | GFP                   | MS/MS          | Predotar | TargetP |
| <i>ORRM2</i>  | At1g73530 RRM similar to S-RBP | 5.00E-23             |                       | P              | P        | P       |
| <i>ORRM3</i>  | At5g06210 mRBP, S-RBP11        | 2.00E-20             |                       |                | M        | M       |
| <i>ORRM4</i>  | At4g20030                      | 4.00E-19             |                       | N              | P        | P       |
| <i>ORRM5</i>  | At2g37510 mRBP, S-RBP9         | 5.00E-19             |                       |                | M        | M       |
| <i>ORRM6</i>  | At3g46020 S-RBP4               | 5.00E-19             |                       |                | M        | M       |
| <i>ORRM7</i>  | At3g23830 mRBP1b, GR-RBP4      | 8.00E-19             | M                     |                | M        | M       |
| <i>ORRM8</i>  | At2g27330                      | 2.00E-18             |                       |                | ER       | M       |
| <i>ORRM9</i>  | At4g13850 mRBP1a, GR-RBP2      | 2.00E-18             |                       | M              | M        | M       |
| <i>ORRM10</i> | At3g26420 AtRZ-1A (GR-RBP)     | 5.00E-17             | N                     | C, Px, PI M    |          |         |
|               | At5g47320 mRBP, RPS19          | 6.00E-17             |                       | M              | M        | M       |
| <i>ORRM11</i> | At5g54580 mRBP, S-RBP12        | 1.00E-16             | M                     |                | M        | P       |
| <i>ORRM12</i> | At4g39260 GR-RBP8              | 3.00E-15             | N                     | N, Px, PI M, P |          |         |
| <i>ORRM13</i> | At5g61030 mRBP2b, GR-RBP3      | 2.00E-14             |                       | M              | M        | M       |
| <i>ORRM14</i> | At5g59860 S-RBP13              | 3.00E-14             |                       |                |          |         |
| <i>ORRM15</i> | At1g74230 mRBP2a, GR-RBP5      | 2.00E-13             |                       | M              | M        | M       |

\*Annotation from Lorkovic and Barta (1) and Vermel et al. (2).

<sup>†</sup>E-value obtained when the RRM motif from *ORRM1* is used as a query

<sup>‡</sup>Subcellular location from the SUBA database (3). C, cytosol; ER, endoplasmic reticulum; M, mitochondrion; N, nucleus; P, plastid; PI M, plasma membrane; Px, peroxisome.

1. Lorković ZJ, Barta A (2002) Genome analysis: RNA recognition motif (RRM) and K homology (KH) domain RNA-binding proteins from the flowering plant *Arabidopsis thaliana*. *Nucleic Acids Res* 30(3):623–635.
2. Vermel M, et al. (2002) A family of RRM-type RNA-binding proteins specific to plant mitochondria. *Proc Natl Acad Sci USA* 99(9):5866–5871.
3. Heazlewood JL, Verboom RE, Tonti-Filippini J, Small I, Millar AH (2007) SUBA: The *Arabidopsis* subcellular database. *Nucleic Acids Res* 35(Database issue):D213–D218.



**Table S4. Primers used in this study**

| Primers          | Sequences                                                                        | Purpose                        |
|------------------|----------------------------------------------------------------------------------|--------------------------------|
| SALK_072648-LP   | TGAACGATTTTATGATTGACGG                                                           | Genotyping                     |
| SALK_072648-RP   | AACCCGAAATGGGTATCAAAG                                                            | Genotyping                     |
| ORRM1_1F         | ATG GAA GCT CTT ATT GCT TCC ACT TC                                               | Complementation                |
| ORRM1_1F_CACC    | caccATG GAA GCT CTT ATT GCT TCC ACT TCC                                          | Complementation                |
| ORRM1_822R       | cta TGA ATC ATC TTG ATC TCT TGA ATC TTG CGT                                      | Truncation/Y2H/complementation |
| RecA_1F_CACC     | caccATGGATTACAGCTAGTCTTGTCTCTG                                                   | Complementation                |
| RecA_ORRM1-C     | CTT TGT CTT TAC GGG AGG AGA CTC GTC GCG ATC<br>GAA TTC AGA ACT GAT TTT GTG GGA G | Complementation                |
| ORRM1_823F       | GAGTCTCCTCCGTAAGCAAAG                                                            | Truncation/Y2H/complementation |
| ORRM1_R          | CTA GAG CCC GAA ACT TGG TTG                                                      | Y2H/complementation            |
| OTP84_133F       | GCCTCCGCCGTTTCTGGCGCA                                                            | Y2H                            |
| OTP84_R          | TCA CCA ATA GTC TCC ACA GGA GCA                                                  | Y2H                            |
| CRR28_121F       | GCCTCCACCGCCGTAACCAT                                                             | Y2H                            |
| CRR28_R          | CTA CCA GTA GTC TAA ACA AGA GCA GGA                                              | Y2H                            |
| ORRM1_151F       | CTCGTCTTCTCATCTTCTGCAATT                                                         | Y2H                            |
| OTP81_127F       | CTCCGCAACTAAAGCAAACCCAT                                                          | Y2H                            |
| OTP81_R          | TCA CCA GAA ATC GTT ACA GGA ACA                                                  | Y2H                            |
| OTP82-292F       | AACCTGTTGATTTGGAACACGATGTTT                                                      | Y2H                            |
| OTP82-R          | CTACCAAGTACATTGCAAGAAACA                                                         | Y2H                            |
| RARE1_100F       | GGATCCATGTCGAGCACTTCTTCCGTCT                                                     | Y2H                            |
| RARE1_R          | TCACCAAGTAATCGTTGCAAGAACA                                                        | Y2H                            |
| ORRM1_163F_BamHI | tatataggatccTCTTCTGCAATTTCCGCACCCGCT                                             | Protein expression             |
| ORRM1_R_Sall     | tatatagtgcacCTA GAG CCC GAA ACT TGG TTG ACT                                      | Protein expression             |
| ndhB-F           | TTTTATGTGGTGCTAACGATTTAA                                                         | Probe for RNA blot             |
| ndhB-R           | AATCGCAATAATCGGGTTCATT                                                           | Probe for RNA blot             |
| ndhD-F           | CATGTGGGGTGGAAAGAAAC                                                             | Probe for RNA blot             |
| ndhD-R           | AGCGCCAATAAAATCCATGAG                                                            | Probe for RNA blot             |
| atpA-maize-F1    | GAGCCGTAATAATTAATTTCTTT                                                          | RT-PCR bulk sequencing         |
| atpA-maize-R1    | ATCCTCTCGTCCGGTATAAAATAG                                                         | RT-PCR bulk sequencing         |
| ndhA-maize-F1    | TAGGGTAGAGGTAGAACTATCAA                                                          | RT-PCR bulk sequencing         |
| ndhA-maize-R1    | ATTCTGCCAAAGAAGAAATAGAA                                                          | RT-PCR bulk sequencing         |
| ndhA-maize-F2    | TTTGGCAGAATGTGAAAGATTACC                                                         | RT-PCR bulk sequencing         |
| ndhA-maize-R2    | GAACCCAGTTAGCATAGGGAACAT                                                         | RT-PCR bulk sequencing         |
| ndhB-maize-F1    | CTATCCGTAGAGTACATTGAATGT                                                         | RT-PCR bulk sequencing         |
| ndhB-maize-R1    | CTAAAAGAGGGTATCCTGAGC                                                            | RT-PCR bulk sequencing         |
| ndhD-maize-F1    | TGAACCCGGATTAGATTTAGAAAG                                                         | RT-PCR bulk sequencing         |
| ndhD-maize-R1    | CGTTCGCCCAAGAAA                                                                  | RT-PCR bulk sequencing         |
| ndhF-maize-F1    | ATCAATATGCCTGGGTAATTCCTC                                                         | RT-PCR bulk sequencing         |
| ndhF-maize-R1    | ATAGGAACACATCCCACAAGTTC                                                          | RT-PCR bulk sequencing         |
| ndhG-maize-F1    | GTCAAGTTCATGAAAAATTTATAC                                                         | RT-PCR bulk sequencing         |
| ndhG-maize-R1    | GAGCCATAGTAATTCACCTATTA                                                          | RT-PCR bulk sequencing         |
| petB-maize-F1    | GAGGCCAACTTTGGTTGTTAATC                                                          | RT-PCR bulk sequencing         |
| petB-maize-R1    | GGACCCGAAATACCTTGCTTACG                                                          | RT-PCR bulk sequencing         |
| rpl2-maize-F1    | CAACCCGGTTATTCTATTCCACTT                                                         | RT-PCR bulk sequencing         |
| rpl2-maize-R1    | TAGCCCCTCTGGGATGTAAAATAT                                                         | RT-PCR bulk sequencing         |
| rpl20-maize-F1   | GGGGGCTCATTAAAGACTTAA                                                            | RT-PCR bulk sequencing         |
| rpl20-maize-R1   | TTGGAAATCGTGTAAAGATTATTT                                                         | RT-PCR bulk sequencing         |
| rpoB-maize-F1    | TATCCGCGAGATTAATTTTTGGTT                                                         | RT-PCR bulk sequencing         |
| rpoB-maize-R1    | TGTAATTCCTGCATAAGGACTCC                                                          | RT-PCR bulk sequencing         |
| rpoC2-maize-F1   | CATATCTTGCCGAGATCTCATCC                                                          | RT-PCR bulk sequencing         |
| rpoC2-maize-R1   | CGCGAATTAGATCATTTGTTTTTA                                                         | RT-PCR bulk sequencing         |
| rps8-maize-F1    | GGCAAGGACACTATTGCTGATTTA                                                         | RT-PCR bulk sequencing         |
| rps8-maize-R1    | CTCCCCAAATCTTTAGTTCG                                                             | RT-PCR bulk sequencing         |
| rps14-maize-F1   | GGAGAAGAAGCGGCAGAAATT                                                            | RT-PCR bulk sequencing         |
| rps14-maize-R1   | GTCCGGATAGCCCAAAGTCTC                                                            | RT-PCR bulk sequencing         |
| ycf3-maize-F1    | ATGCCTAGATCCCGTATAAATGG                                                          | RT-PCR bulk sequencing         |
| ycf3-maize-R1    | TTCCGAATCGCCCTGTAGAA                                                             | RT-PCR bulk sequencing         |

Y2H, yeast two-hybrid.
